# Supplementary material for: Cbfβ Is a Novel Modulator Against Osteoarthritis by Maintaining Articular Cartilage Homeostasis Through TGF-Ꞵ Signaling
Source: Preprints.org preprint supplement (doi:10.20944/preprints202302.0284.v1), 2023-02-16
Supplement: Supplementary file 1 [file supplementary]

Type of the Paper (Article)

Cbfβ is a novel modulator against osteoarthritis by maintaining articular cartilage homeostasis through TGF-ꞵ signaling

Xiangguo Che1,#, Xian Jin1,#, Narae Park1, Hee-June Kim2, Hee-Soo Kyung2, Hyun-Ju Kim1, Jane B. Lian3, Janet L. Stein3, Gary S. Stein3, and Je-Yong Choi1,*

1Department of Biochemistry and Cell Biology, Cell and Matrix Research Institute, Korea Mouse Phenotyping Center, KNU Convergence Educational Program of Biomedical Sciences for Creative Future Talents, School of Medicine, Kyungpook National University, Daegu 41944 Korea; xiangguo0622@naver.com (X-G.C.), kimhan911021@naver.com (X.J.), nrpark85@naver.com (P.N.R.), biohjk@knu.ac.kr (K.H.J)

2Department of Orthopedic Surgery, School of Medicine, Kyungpook National University, Kyungpook National University Hospital, Daegu 41944 Korea; june0104@daum.net (K.H.J), hskyung@knu.ac.kr (H.S.K)

3Department of Biochemistry and University of Vermont Cancer Center, University of Vermont College of Medicine, Burlington, VT 05405, U.S.A; jane.lian@med.uvm.edu (J.B.L), janet.stein@med.uvm.edu (S.J.L), gary.stein@med.uvm.edu (G.S.S),

# These authors contributed equally to this work

*Correspondence: jechoi@knu.ac.kr (J.-Y.C.); Tel.: +82-53-420-4823 (J.-Y.-C.)


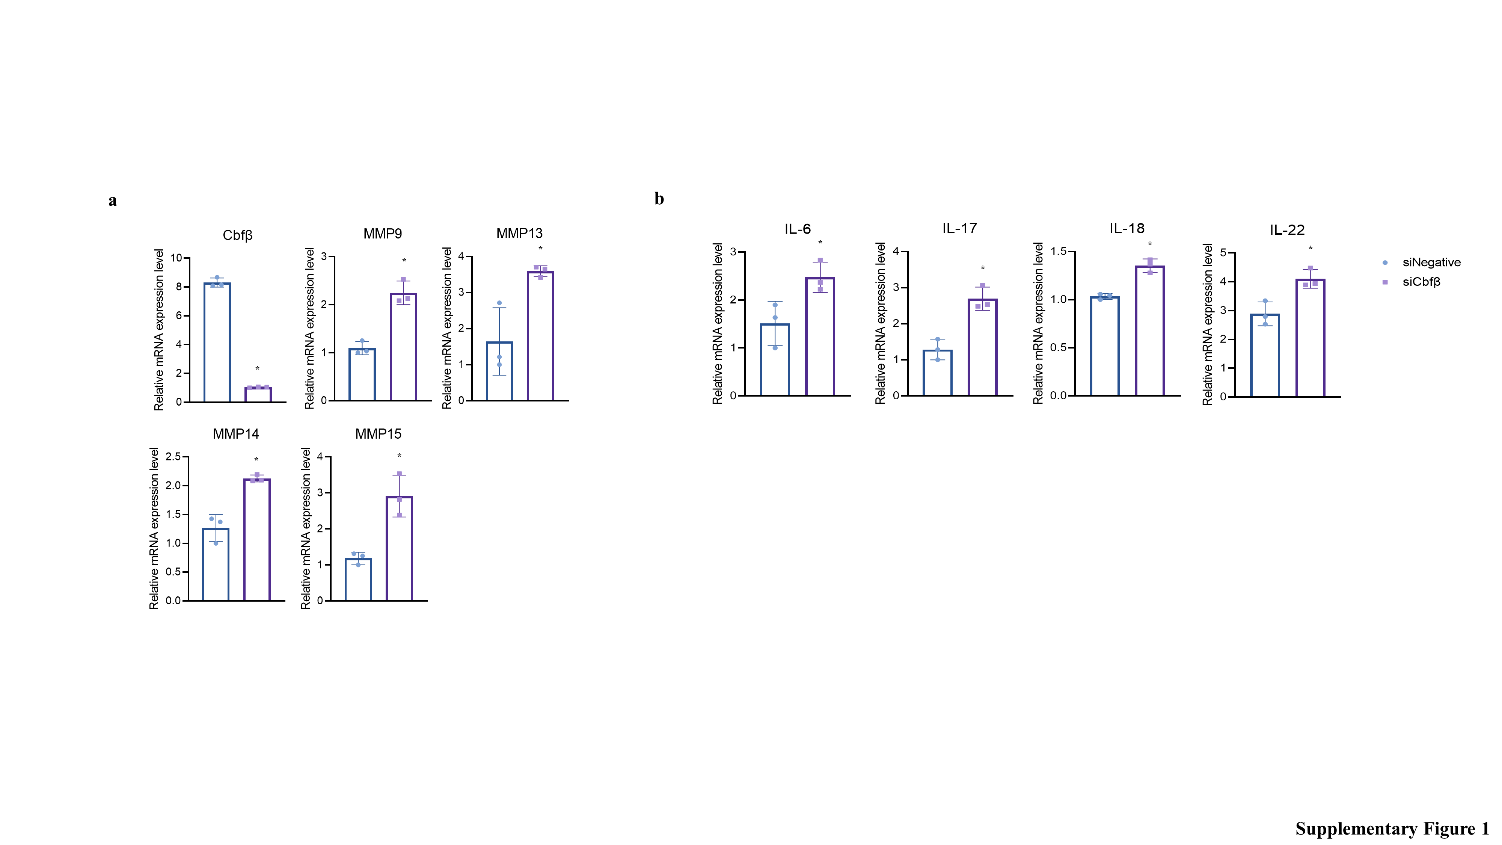


Supplementary Figure 1. Cbfꞵ loss induces catabolic factors expression

(a and b) Mmps and inflammatory cytokine expression were performed by qRT-PCR.


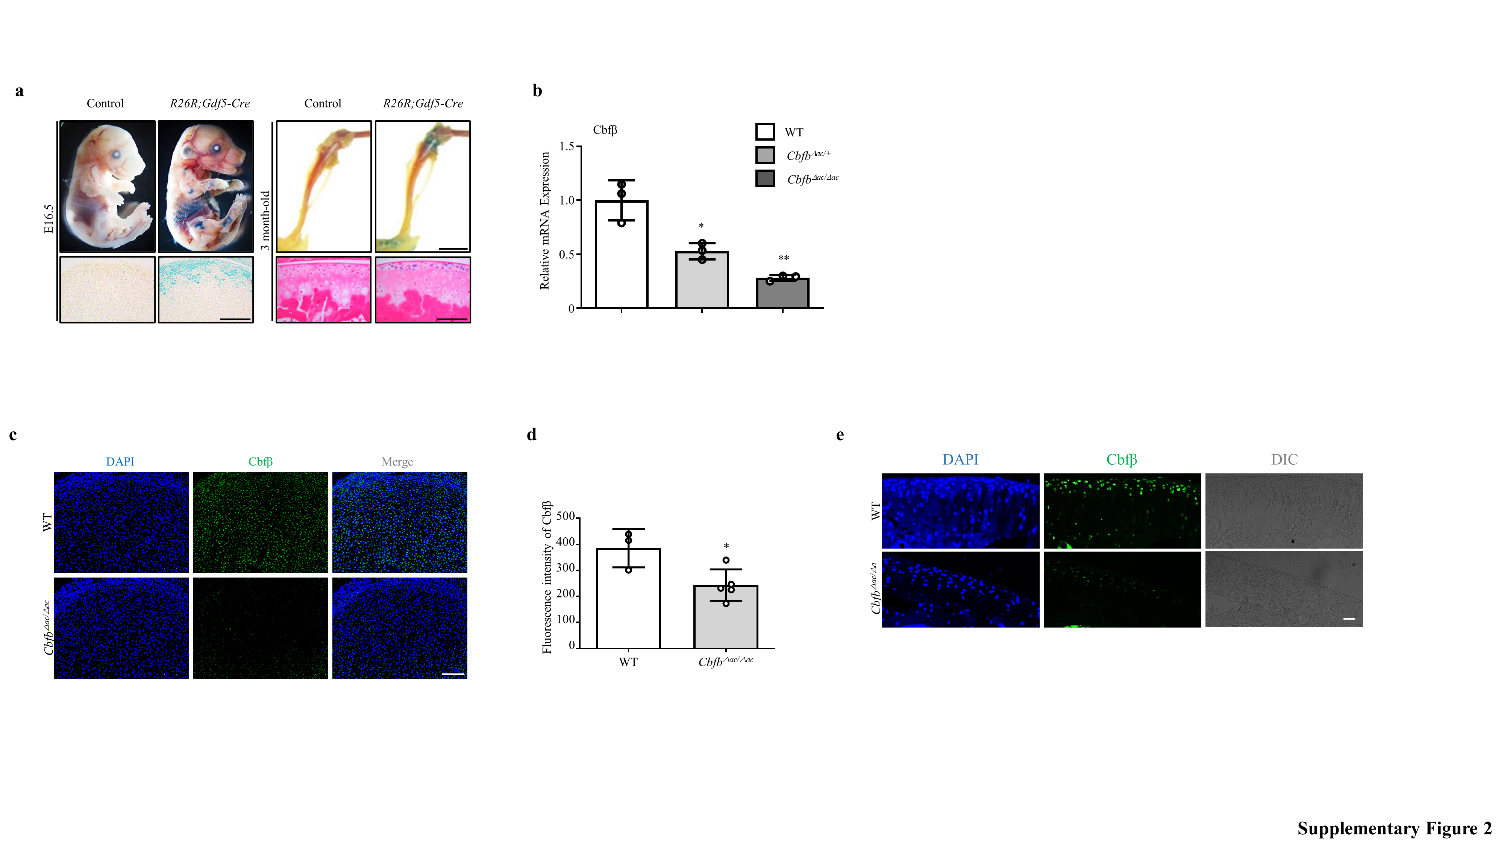


Supplementary Figure 2. The Gdf5-Cre transgene is active in articular cartilage

(a) X-gal stained whole embryos and paraffin sections of the humerus from *R26R;Gdf5-Cre* and WT mice at embryonic day 16.5 (E16.5) (left panel). X-gal stained hindlimb (blue areas) and paraffin sections of the tibia joint from *R26R;Gdf5-Cre* and WT mice at 3 months (right panel). (b) The expression of Cbfβ in the *CbfbΔac/Δac* articular chondrocytes was determined by qRT-PCR. (c) The expression of Cbfβ in articular chondrocytes at E16.5 was imaged by immunofluorescent staining, and its quantification was evaluated using Image J (d). (e) The expression of Cbfβ in articular chondrocytes at 20-week-old mice were imaged by immunofluorescent staining. DIC, differential interference contrast.
